# Supplementary material for: An integrated one-step system to extract, analyze and annotate all relevant information from image-based cell screening of chemical libraries
Source: Royal Society of Chemistry journal article supplement (doi:10.1039/b919830j), 2010-01-21
Supplement: b919830j.pdf [file b919830j.pdf]

## **Supplementary Information**

### **An integrated one step system to extract, analyze and annotate all relevant information from image-based cell screening of chemical libraries**

Obdulia Rabal, Wolfgang Link, Beatriz G. Serelde, James R. Bischoff and Julen Oyarzabal\*

Experimental Therapeutics Programme, Centro Nacional de Investigaciones Oncológicas (CNIO), Melchor Fernández Almagro 3, 28029 Madrid, Spain.

#### **Table of Contents**

|                                      |   |
|--------------------------------------|---|
| <b>Supplementary Table S1</b> .....  | 2 |
| <b>Supplementary Table S2</b> .....  | 3 |
| <b>Supplementary Table S3</b> .....  | 5 |
| <b>Supplementary Table S4</b> .....  | 6 |
| <b>Supplementary Table S5</b> .....  | 7 |
| <b>Supplementary Figure S1</b> ..... | 8 |
| <b>Supplementary Figure S2</b> ..... | 9 |
| <b>Supplementary Figure S3</b> ..... | 9 |

**Supplementary Table S1-** Cellular features collected by AttoVision software within BD Pathway Bioimager.

---

| #  | Cellular Feature    | Definition                                                          |
|----|---------------------|---------------------------------------------------------------------|
| 1  | Nucleus_Pixels      | Number of pixels of the nuclear region (Nuclear Area)               |
| 2  | Nucleus_Verticies   | Number of pixels on the inner and outer boundaries of the nuclei.   |
| 3  | DAPI_Intensity      | Average pixel intensity within the nuclear region on Ch1 (DAPI)     |
| 4  | Cytoplasm_Pixels    | Number of pixels of the cytoplasmic region                          |
| 5  | Cytoplasm_Verticies | Number of pixels on the inner and outer boundaries of the cytoplasm |
| 6  | GFP cyt_Intensity   | Average pixel intensity within the cytoplasmic region on Ch2 (GFP)  |
| 7  | GFP nucl_Intensity  | Average pixel intensity within the nuclear region on Ch2 (GFP)      |
| 8  | Nucleus_W           | Bounding Box Width of the nuclear region                            |
| 9  | Nucleus_H           | Bounding Box Height of the nuclear region                           |
| 10 | Cytoplasm_W         | Bounding Box Width of the cytoplasmic region                        |
| 11 | Cytoplasm_H         | Bounding Box Height of the cytoplasmic region                       |

---

**Supplementary Table S2-** Cellular features collected by HCS tool for automated image analysis.

| #  | Cellular Feature                                | Definition                                                                                    |
|----|-------------------------------------------------|-----------------------------------------------------------------------------------------------|
| 1  | nuclear_plus_gfp_SumOfPixelIntensities          | Sum of pixel intensities within the nucleus and cytoplasm on Ch2 (GFP)                        |
| 2  | nuclear_plus_gfp_SumOfSquaredPixelIntensities   | Sum of squared pixel intensities within the nucleus and cytoplasm on Ch2 (GFP)                |
| 3  | nuclear_plus_gfp_SumOf3rdPowerPixelIntensities  | Sum of 3 <sup>rd</sup> Power Pixel Intensities within the nucleus and cytoplasm on Ch2 (GFP)  |
| 4  | nuclear_plus_gfp_SumOf4thPowerPixelIntensities  | Sum of 4th Power Pixel Intensities within the nucleus and cytoplasm on Ch2 (GFP)              |
| 5  | nuclear_plus_gfp_PixelIntensityMean             | Average Pixel Intensity within the nucleus and cytoplasm on Ch2 (GFP)                         |
| 6  | nuclear_plus_gfp_PixelIntensityVariance         | Variance in pixel intensity within the nucleus and cytoplasm on Ch2 (GFP)                     |
| 7  | nuclear_gfp_SumOfPixelIntensities               | Sum of pixel intensities within the nucleus on Ch2 (GFP)                                      |
| 8  | nuclear_gfp_SumOfSquaredPixelIntensities        | Sum of squared pixel intensities within the nucleus on Ch2 (GFP)                              |
| 9  | nuclear_gfp_SumOf3rdPowerPixelIntensities       | Sum of 3 <sup>rd</sup> Power Pixel Intensities within the nucleus on Ch2 (GFP)                |
| 10 | nuclear_gfp_SumOf4thPowerPixelIntensities       | Sum of 4th Power Pixel Intensities within the nucleus on Ch2 (GFP)                            |
| 11 | nuclear_gfp_PixelIntensityMean                  | Average Pixel Intensity within the nucleus on Ch2 (GFP)                                       |
| 12 | nuclear_gfp_PixelIntensityVariance              | Variance in pixel intensity within the nucleus on Ch2 (GFP)                                   |
| 13 | nuclear_plus_dapi_SumOfPixelIntensities         | Sum of pixel intensities within the nucleus and cytoplasm on Ch1 (DAPI)                       |
| 14 | nuclear_plus_dapi_SumOfSquaredPixelIntensities  | Sum of squared pixel intensities within the nucleus and cytoplasm on Ch1 (DAPI)               |
| 15 | nuclear_plus_dapi_SumOf3rdPowerPixelIntensities | Sum of 3 <sup>rd</sup> Power Pixel Intensities within the nucleus and cytoplasm on Ch1 (DAPI) |
| 16 | nuclear_plus_dapi_SumOf4thPowerPixelIntensities | Sum of 4th Power Pixel Intensities within the nucleus and cytoplasm on Ch1 (DAPI)             |
| 17 | nuclear_plus_dapi_PixelIntensityMean            | Average Pixel Intensity within the nucleus and cytoplasm on Ch1 (DAPI)                        |
| 18 | nuclear_plus_dapi_PixelIntensityVariance        | Variance in pixel intensity within the nucleus and cytoplasm on Ch1 (DAPI)                    |
| 19 | nuclear_dapi_SumOfPixelIntensities              | Sum of pixel intensities within the nucleus on Ch1 (DAPI)                                     |
| 20 | nuclear_dapi_SumOfSquaredPixelIntensities       | Sum of squared pixel intensities within the nucleus on Ch1 (DAPI)                             |
| 21 | nuclear_dapi_SumOf3rdPowerPixelIntensities      | Sum of 3 <sup>rd</sup> Power Pixel Intensities within the nucleus on Ch1 (DAPI)               |
| 22 | nuclear_dapi_SumOf4thPowerPixelIntensities      | Sum of 4th Power Pixel Intensities within the nucleus on Ch1 (DAPI)                           |
| 23 | nuclear_dapi_PixelIntensityMean                 | Average Pixel Intensity within the nucleus on Ch1 (DAPI)                                      |
| 24 | nuclear_dapi_PixelIntensityVariance             | Variance in pixel intensity within the nucleus on Ch1 (DAPI)                                  |
| 25 | nuclear_BlobArea                                | Nuclear Area (pixels)                                                                         |
| 26 | nuclear_BlobPerimeter                           | Nuclear Perimeter                                                                             |
| 27 | nuclear_BlobCircularity                         | Nuclear circularity                                                                           |
| 28 | nuclear_BoundingBoxWidth                        | Nuclear Bounding Box Width                                                                    |
| 29 | nuclear_BoundingBoxHeight                       | Nuclear Bounding Box Height                                                                   |
| 30 | nuclear_EquivalentDiameter                      | Diameter of the circle of the same area as nucleus                                            |

|    |                                              |                                                                                                               |
|----|----------------------------------------------|---------------------------------------------------------------------------------------------------------------|
| 31 | nuclear_ConvexArea                           | Area of the convex hull (area of the smallest convex set of pixels containing the entire nuclear object)      |
| 32 | nuclear_Solidity                             | Nuclear area divided by the area of the convex hull                                                           |
| 33 | nuclear_FormFactor                           | Measure of nuclear circularity. ( $4\pi \cdot \text{area} / \text{perimeter squared}$ )                       |
| 34 | nuclear_DistanceToNearestNeighborCentroid    | Distance to nearest nucleus (Centroid - Centroid)                                                             |
| 35 | nuclear_DistanceToNearestNeighborBoundary    | Distance to nearest nucleus (Boundary - Boundary)                                                             |
| 36 | nuclear_dapi_SumOfPixelIntensities_T         | Sum of pixel intensities within the nucleus on Ch1 (DAPI) with Autothresholding segmentation                  |
| 37 | nuclear_dapi_SumOfSquaredPixelIntensities_T  | Sum of squared pixel intensities within the nucleus on Ch1 (DAPI) with Autothresholding                       |
| 38 | nuclear_dapi_SumOf3rdPowerPixelIntensities_T | Sum of 3 <sup>rd</sup> Power Pixel Intensities within the nucleus on Ch1 (DAPI) with Autothresholding         |
| 39 | nuclear_dapi_SumOf4thPowerPixelIntensities_T | Sum of 4th Power Pixel Intensities within the nucleus on Ch1 (DAPI) with Autothresholding                     |
| 40 | nuclear_dapi_PixelIntensityMean_T            | Average Pixel Intensity within the nucleus on Ch1 (DAPI) with Autothresholding segmentation                   |
| 41 | nuclear_dapi_PixelIntensityVariance_T        | Variance in pixel intensity within the nucleus on Ch1 (DAPI) with Autothresholding                            |
| 42 | nuclear_BlobArea_T                           | Nuclear Area (pixels) with Autothresholding segmentation                                                      |
| 43 | nuclear_BlobPerimeter_T                      | Nuclear Perimeter with Autothresholding segmentation                                                          |
| 44 | nuclear_BlobCircularity_T                    | Nuclear circularity with Autothresholding segmentation                                                        |
| 45 | nuclear_EquivalentDiameter_T                 | Diameter of the circle of the same area as nucleus with Autothresholding segmentation                         |
| 46 | nuclear_ConvexArea_T                         | Area of the convex hull with Autothresholding segmentation                                                    |
| 47 | nuclear_Solidity_T                           | Nuclear area divided by the area of the convex hull with Autothresholding segmentation                        |
| 48 | nuclear_FormFactor_T                         | Measure of nuclear circularity. ( $4\pi \cdot \text{area} / \text{perimeter squared}$ ) with Autothresholding |

---

**Supplementary Table S3** – Results from BD Pathway Bioimager

---

|                                                  | Total Compounds |
|--------------------------------------------------|-----------------|
| Total Compounds in HCS                           | 33,992          |
| Primary Hits identified with BD Pathway          | 448             |
| Hits from VS analysis complementing primary Hits | 91              |
| Confirmed secondary Hits                         | 228             |
| PI3K Inhibitors                                  | 54              |

---

**Supplementary Table S3 Footnote**

Of the 33,992 compounds tested, 448 (1.32%) met the active criterion defined using the BD Pathway Bioimager and produced 60% inhibition of Akt-mediated FOXO-GFP translocation. To maximize, in terms of quality and quantity, the information obtained from this screening; once hits from primary screening were selected an additional step was performed: identification of false positives (FP) and false negatives (FN). Thus, all hits from primary screening together with those initially non-hits rescued by virtual screening (VS) techniques were further confirmed in a second HCS round. Virtual screening, and visual inspection of a number of wells, complemented the initial hit pool with 91 additional compounds. For those 228 confirmed positive hits, PI3K inhibitory activity was experimentally estimated through its corresponding biochemical assay<sup>14</sup>

**Supplementary Table S4**– *p*-Values obtained for each of the 13 cytological features initially considered for cytotoxicity assessment for the 168-membered library. Different Student's *t*-tests were conducted for different plates, comparing reference cytotoxic compound vs untreated (controls) wells and non-cytotoxic compounds vs untreated (controls). Bold values show significance level of 1% or better (*p*-value < 0.01). 7 cytological features (*in bold*) were finally selected.

| Cytological Feature (All nuclear)                 | Cytotoxic vs untreated |                   |                     | Non-cytotoxic vs untreated |                    |                     |
|---------------------------------------------------|------------------------|-------------------|---------------------|----------------------------|--------------------|---------------------|
|                                                   | Plate I<br>(n=14)      | Plate II<br>(n=9) | Plate III<br>(n=13) | Plate I<br>(n=92)          | Plate II<br>(n=19) | Plate III<br>(n=83) |
|                                                   | <i>P</i>               | <i>P</i>          | <i>P</i>            | <i>P</i>                   | <i>P</i>           | <i>P</i>            |
| <b>nuclear_dapi_PixelIntensityVariance_T_Mean</b> | <b>4.E-15</b>          | <b>1.E-03</b>     | <b>2.E-06</b>       | 0.92                       | 0.03               | 0.38                |
| <b>nuclear_EquivalentDiameter_T_Mean</b>          | <b>9.E-10</b>          | <b>6.E-03</b>     | <b>3.E-08</b>       | 0.94                       | 0.11               | 0.31                |
| <b>nuclear_BlobPerimeter_T_Mean</b>               | <b>3.E-09</b>          | <b>4.E-03</b>     | <b>5.E-09</b>       | 0.94                       | 0.20               | 0.17                |
| <b>nuclear_BlobArea_T_Mean</b>                    | <b>3.E-09</b>          | <b>4.E-03</b>     | <b>4.E-08</b>       | 0.77                       | 0.10               | 0.30                |
| <b>nuclear_ConvexArea_T_Mean</b>                  | <b>5.E-09</b>          | <b>4.E-03</b>     | <b>2.E-08</b>       | 0.75                       | 0.12               | 0.27                |
| <b>nuclear_dapi_PixelIntensityMean_T_Mean</b>     | <b>1.E-07</b>          | <b>3.E-04</b>     | <b>4.E-08</b>       | 0.99                       | 0.43               | 0.14                |
| <b>Cell_Density_Mean</b>                          | <b>3.E-05</b>          | <b>1.E-03</b>     | <b>4.E-04</b>       | 0.10                       | 0.90               | 0.29                |
| nuclear_dapi_SumOf4thPowerPixelIntensities_T_Mean | <b>5.E-06</b>          | 0.04              | <b>2.E-07</b>       | 0.81                       | 0.81               | 0.15                |
| nuclear_BlobCircularity_T_Mean                    | <b>2.E-05</b>          | 0.02              | <b>3.E-05</b>       | 0.86                       | 0.45               | 0.45                |
| nuclear_FormFactor_T_Mean                         | <b>2.E-05</b>          | 0.02              | <b>3.E-05</b>       | 0.86                       | 0.45               | 0.45                |
| nuclear_dapi_SumOf3rdPowerPixelIntensities_T_Mean | <b>4.E-05</b>          | 0.15              | <b>4.E-07</b>       | 0.86                       | 0.59               | 0.16                |
| nuclear_dapi_SumOfSquaredPixelIntensities_T_Mean  | <b>4.E-03</b>          | 0.98              | <b>3.E-06</b>       | 0.92                       | 0.34               | 0.19                |
| nuclear_dapi_SumOfPixelIntensities_T_Mean         | 0.09                   | 0.07              | 0.01                | 0.95                       | 0.15               | 0.35                |
| nuclear_Solidity_T_Mean                           | 0.77                   | 0.73              | 0.04                | 0.84                       | 0.32               | 0.89                |

**Supplementary Table S5** - Confusion matrix, kappa values, sensitivity and specificity obtained for each of the different definitions established to classify compounds as cytotoxic or not from the 168-membered reference library. Each of the seven significant cytological features found with Student's *t*-test, was defined as outlier if the mean value for a well was 1, 1.5, 2 or 3 standard deviations (SD) away from the mean values of the negative controls. In different models, a minimum number of outlier features was required to classify compounds as cytotoxic or not and the corresponding confusion matrix resulting from classification was calculated.

|        | Number of outlier features required | TP        | TN         | FP       | FN       | <i>Kappa</i> | Sensitivity | Specificity |
|--------|-------------------------------------|-----------|------------|----------|----------|--------------|-------------|-------------|
| 1 SD   | 7                                   | 12        | 155        | 1        | 0        | 0.96         | 100         | 99          |
|        | 6                                   | 12        | 141        | 15       | 0        | 0.57         | 100         | 90          |
|        | 5                                   | 12        | 137        | 19       | 0        | 0.51         | 100         | 88          |
|        | 4                                   | 12        | 119        | 37       | 0        | 0.31         | 100         | 76          |
|        | 3                                   | 12        | 116        | 40       | 0        | 0.29         | 100         | 74          |
|        | 2                                   | 12        | 102        | 54       | 0        | 0.21         | 100         | 65          |
|        | 1                                   | 12        | 67         | 89       | 0        | 0.10         | 100         | 43          |
| 1.5 SD | 7                                   | 12        | 156        | 0        | 0        | 1.00         | 100         | 100         |
|        | 6                                   | 12        | 144        | 12       | 0        | 0.72         | 100         | 92          |
|        | 5                                   | 12        | 142        | 14       | 0        | 0.70         | 100         | 91          |
|        | 4                                   | 12        | 134        | 22       | 0        | 0.63         | 100         | 86          |
|        | 3                                   | 12        | 127        | 29       | 0        | 0.58         | 100         | 81          |
|        | 2                                   | 12        | 117        | 39       | 0        | 0.53         | 100         | 75          |
|        | 1                                   | 12        | 89         | 67       | 0        | 0.42         | 100         | 57          |
| 2 SD   | 7                                   | 11        | 156        | 0        | 1        | 0.95         | 92          | 100         |
|        | <b>6</b>                            | <b>12</b> | <b>152</b> | <b>4</b> | <b>0</b> | <b>0.86</b>  | <b>100</b>  | <b>97</b>   |
|        | 5                                   | 12        | 147        | 9        | 0        | 0.76         | 100         | 94          |
|        | 4                                   | 12        | 141        | 15       | 0        | 0.69         | 100         | 90          |
|        | 3                                   | 12        | 140        | 16       | 0        | 0.68         | 100         | 90          |
|        | 2                                   | 12        | 126        | 30       | 0        | 0.57         | 100         | 81          |
|        | 1                                   | 12        | 103        | 53       | 0        | 0.47         | 100         | 66          |
| 3 SD   | 7                                   | 9         | 156        | 3        | 3        | 0.82         | 75          | 98          |
|        | 6                                   | 12        | 152        | 2        | 0        | 0.86         | 100         | 99          |
|        | 5                                   | 12        | 154        | 2        | 0        | 0.92         | 100         | 99          |
|        | 4                                   | 12        | 151        | 5        | 0        | 0.84         | 100         | 97          |
|        | 3                                   | 12        | 150        | 6        | 0        | 0.82         | 100         | 96          |
|        | 2                                   | 12        | 141        | 15       | 0        | 0.69         | 100         | 90          |
|        | 1                                   | 12        | 123        | 33       | 0        | 0.56         | 100         | 79          |

## II. Supplementary Figures

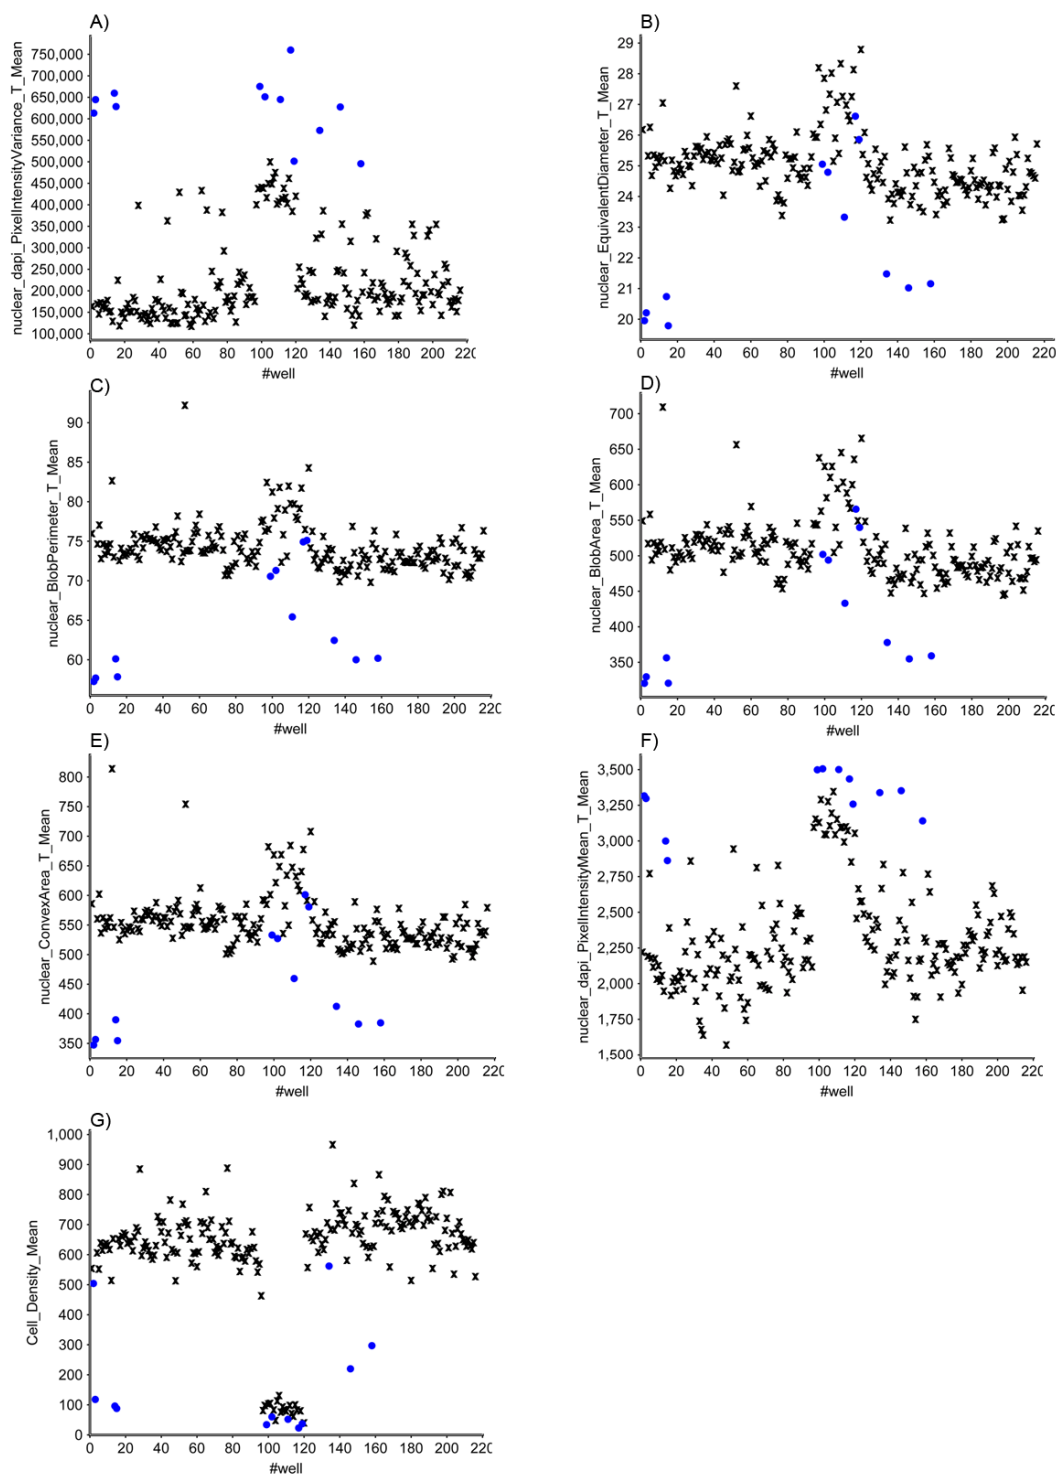

**Supplementary Fig. S1.** Key cytological features plot for phenotypic profiling as cytotoxic compound plot for the 12 reference cytotoxic compounds (blue dots) and for the 156 non-cytotoxic compounds and negative controls (black crosses); clearly this is playing a role.



|                       |          | Actual Value |          |       |
|-----------------------|----------|--------------|----------|-------|
|                       |          | Positive     | Negative | Total |
| Prediction<br>Outcome | Positive | TP           | FP       | $p'$  |
|                       | Negative | FN           | TN       | $n'$  |
| Total                 |          | $p$          | $n$      | $N$   |

**Supplementary Fig. S2.** Confusion Matrix, with the number of true positives (TP), false positives (FP), false negatives (FN) and true negatives (TN).

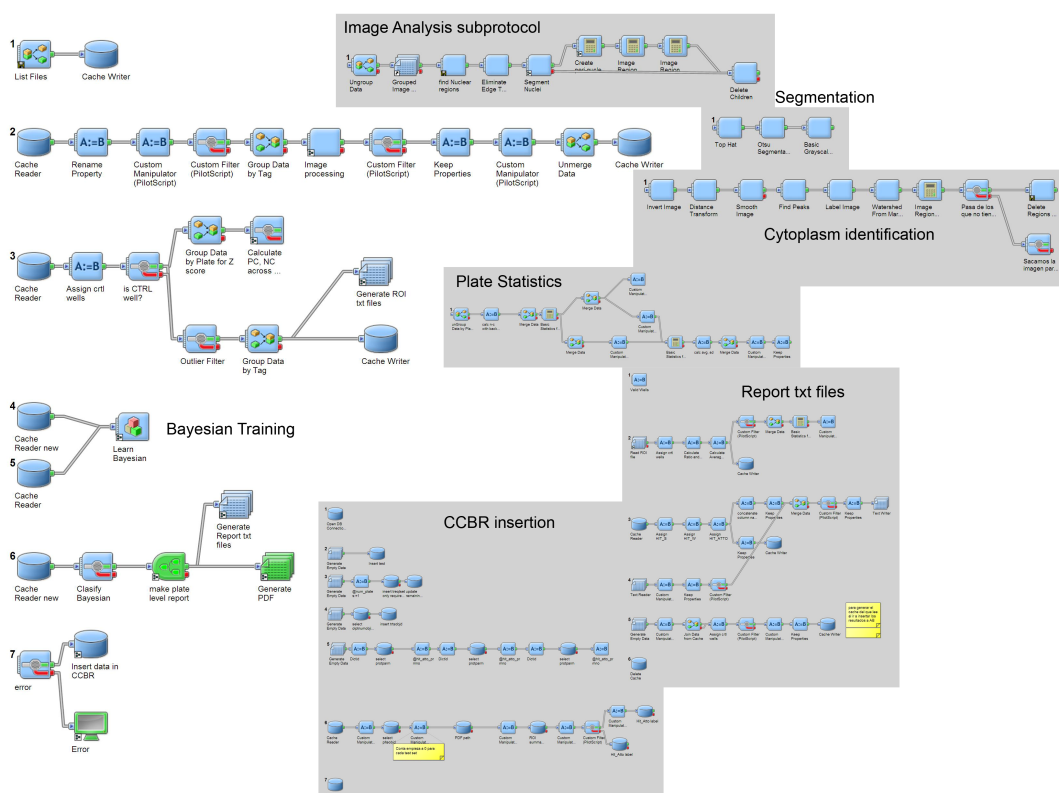

**Supplementary Fig. S3.** Screenshot of the Pipeline Pilot protocol. Many steps are collapsed into different subprotocols, some of them are exemplified in those gray-background images.
